# Supplementary material for: Klf5 regulates muscle differentiation by directly targeting muscle-specific genes in cooperation with MyoD in mice
Source: eLife journal article supplement (doi:10.7554/elife.17462), 2016-10-15
Supplement: supp [file elife-17462-supp-v1.zip]

Archive with 12 entries (12 files):
- elife_poa_e17462_Figure_5_Figure_Supplement_3.pdf
- elife_poa_e17462_Figure_3_Figure_Supplement_3.pdf
- elife_poa_e17462_Supplementary_File_1.doc
- elife_poa_e17462_Figure_1_Figure_Supplement_1.psd
- elife_poa_e17462_Figure_5_Figure_Supplement_1.pdf
- elife_poa_e17462_Figure_4_source_data_1.doc
- elife_poa_e17462_Figure_6_Figure_Supplement_1.pdf
- elife_poa_e17462_Figure_3_Figure_Supplement_2.pdf
- elife_poa_e17462_Figure_2_figure_supplement_1.psd
- elife_poa_e17462_Figure_5_Figure_Supplement_2.pdf
- elife_poa_e17462_Figure_6_Figure_Supplement_2.pdf
- elife_poa_e17462_Figure_3_Figure_Supplement_1.psd
