# Supplementary material for: Klf5 regulates muscle differentiation by directly targeting muscle-specific genes in cooperation with MyoD in mice
Source: eLife journal article supplement (doi:10.7554/elife.17462), 2016-10-15
Supplement: supp [file elife-17462-supp-v1.zip › elife_poa_e17462_Figure_3_Figure_Supplement_2.pdf]

**A**

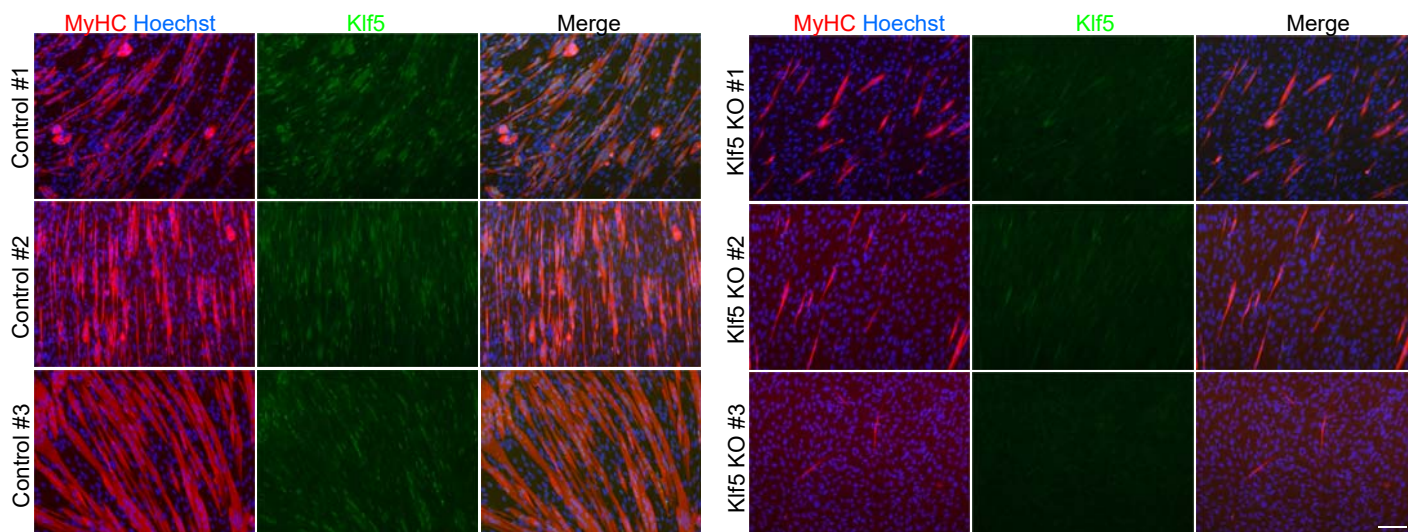

**B**

Klf5 KO C2C12-Clone #1 both alleles (1 bp-deletion)

```

      *      *      *      *      *      *      *      *
1  ATGAGCGCCCGCTGGGACCACTGCCCCAGCCGCGCGCCGCGCAGGACGAGCCCGTGTTCGCGCAGCTCAAGCCGGTGCT 80
1  ATGAGCGCCCGCTGGGACCACTGCCCCAGCCGCGCGCCGCGCAGGACGAGCCCGTGTTCGCGCAGCTCAAGCCGGTGCT 80
      *      *      *      *      *      *      *      *
81  GGGCGCTGCGAACC CGCCCGCGACGCGG GCTCTTCTCCGGAGACGATCTGAAACACGCGCACCAACCCGCGCTGCGC 160
81  GGGCGCTGCGAACC CGCCCGCGACGCGG GCTCTTCTCCGGAGACGATCTGAAACACGCGCACCAACCCGCGCTGCGC 159
      *      *      *      *      *      *      *      *

```

Klf5 KO C2C12-Clone #2 allele1 (33 bp-deletion & 1 bp-substitution)

```

      *      *      *      *      *      *      *      *
1  ATGAGCGCCCGCTGGGACCACTGCCCCAGCCGCGCGCCGCGCAGGACGAGCCCGTGTTCGCGCAGCTCAAGCCGGTGCT 80
1  ATGAGCGCCCGCTGGGACCACTGCCCCAGCCGCGCGCCGCGCAGGACGAGCCCGTGTTCGCGCAGCTCAAGCCGGTGCT 80
      *      *      *      *      *      *      *      *
81  GGGCGCTGCGAACC CGCCCGCGACGCGG GCTCTTCTCCGGAGACGATCTGAAACACGCGCACCAACCCGCGCTGCGC 160
81  -----CTTCTCCGGAGACGATCTGAAACACGCGCGCCACCAACCCGCGCTGCGC 127
      *      *      *      *      *      *      *      *

```

Klf5 KO C2C12-Clone #2 allele2 (33 bp-deletion)

```

      *      *      *      *      *      *      *      *
1  ATGAGCGCCCGCTGGGACCACTGCCCCAGCCGCGCGCCGCGCAGGACGAGCCCGTGTTCGCGCAGCTCAAGCCGGTGCT 80
1  ATGAGCGCCCGCTGGGACCACTGCCCCAGCCGCGCGCCGCGCAGGACGAGCCCGTGTTCGCGCAGCTCAAGCCGGTGCT 80
      *      *      *      *      *      *      *      *
81  GGGCGCTGCGAACC CGCCCGCGACGCGG GCTCTTCTCCGGAGACGATCTGAAACACGCGCACCAACCCGCGCTGCGC 160
81  -----CTTCTCCGGAGACGATCTGAAACACGCGCGCCACCAACCCGCGCTGCGC 127
      *      *      *      *      *      *      *      *

```

Klf5 KO C2C12-Clone #3 both alleles (44 bp-deletion)

```

      *      *      *      *      *      *      *      *
1  ATGAGCGCCCGCTGGGACCACTGCCCCAGCCGCGCGCCGCGCAGGACGAGCCCGTGTTCGCGCAGCTCAAGCCGGTGCT 80
1  ATGAGCGCCCGCTGGGACCACTGCCCCAGCCGCGCGCCGCGCAGGACGAGCCCGTGTTCGCGCAGCTCAAGCC----- 74
      *      *      *      *      *      *      *      *
81  GGGCGCTGCGAACC CGCCCGCGACGCGG GCTCTTCTCCGGAGACGATCTGAAACACGCGCACCAACCCGCGCTGCGC 160
75  -----GGAGACGATCTGAAACACGCGCGCACCAACCCGCGCTGCGC 114
      *      *      *      *      *      *      *      *

```
