# Supplementary figures and images for: Klf5 regulates muscle differentiation by directly targeting muscle-specific genes in cooperation with MyoD in mice
Source: eLife journal article supplement (doi:10.7554/elife.17462), 2016-10-15

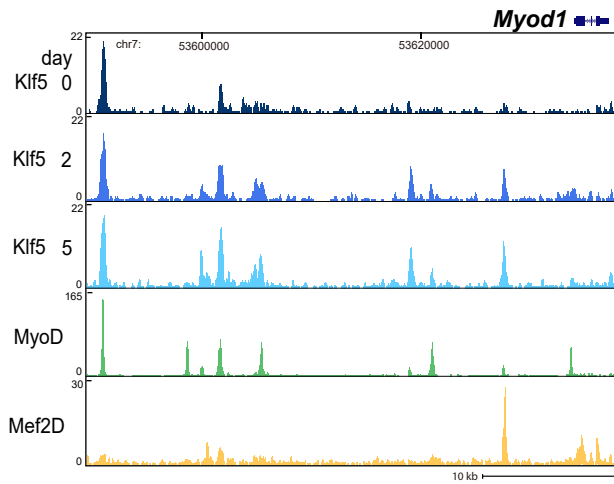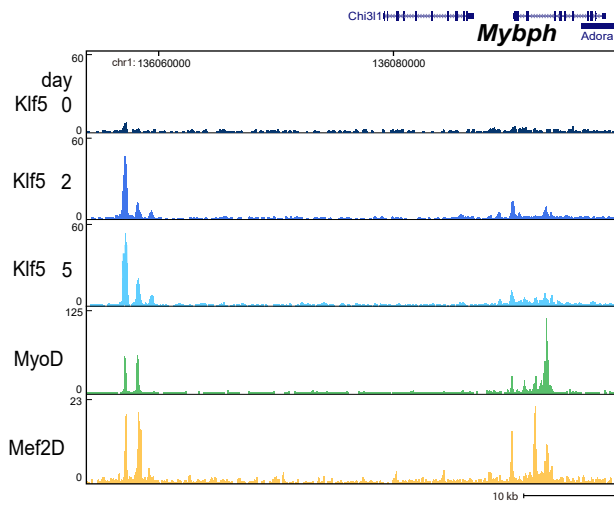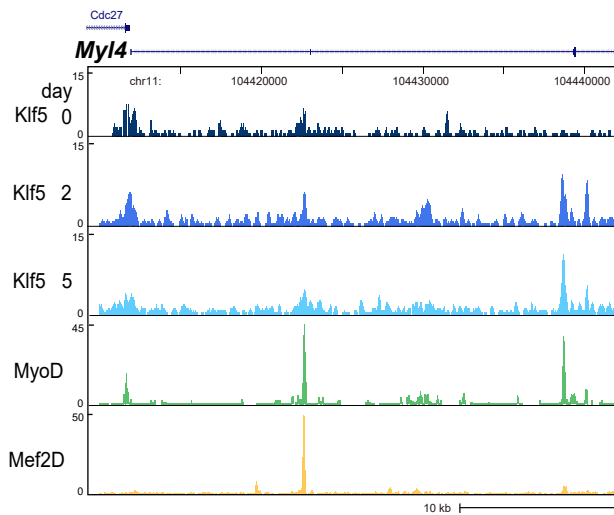

Supplement: supp [file elife-17462-supp-v1.zip]

**A**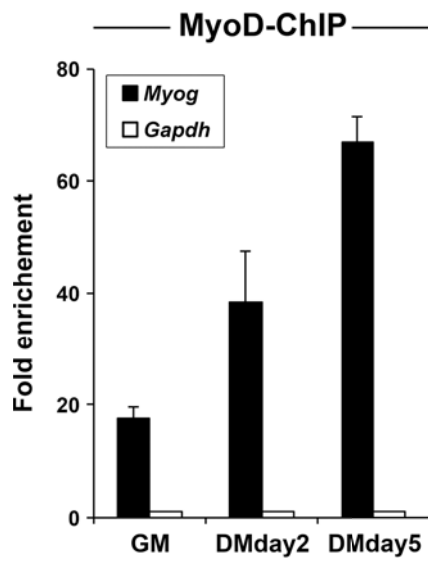**B**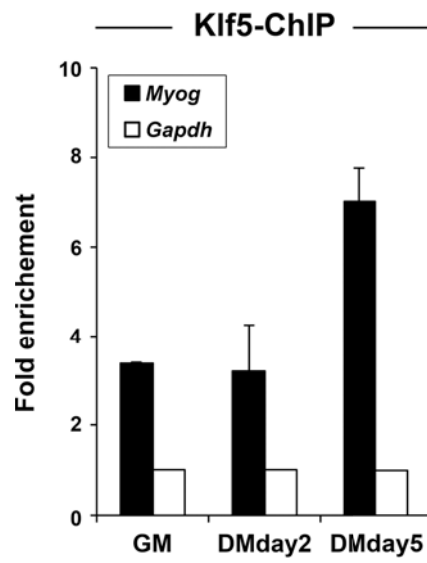**C**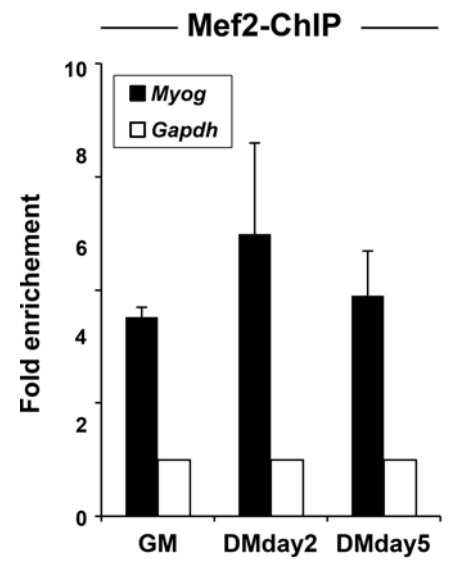

Supplement: supp [file elife-17462-supp-v1.zip]

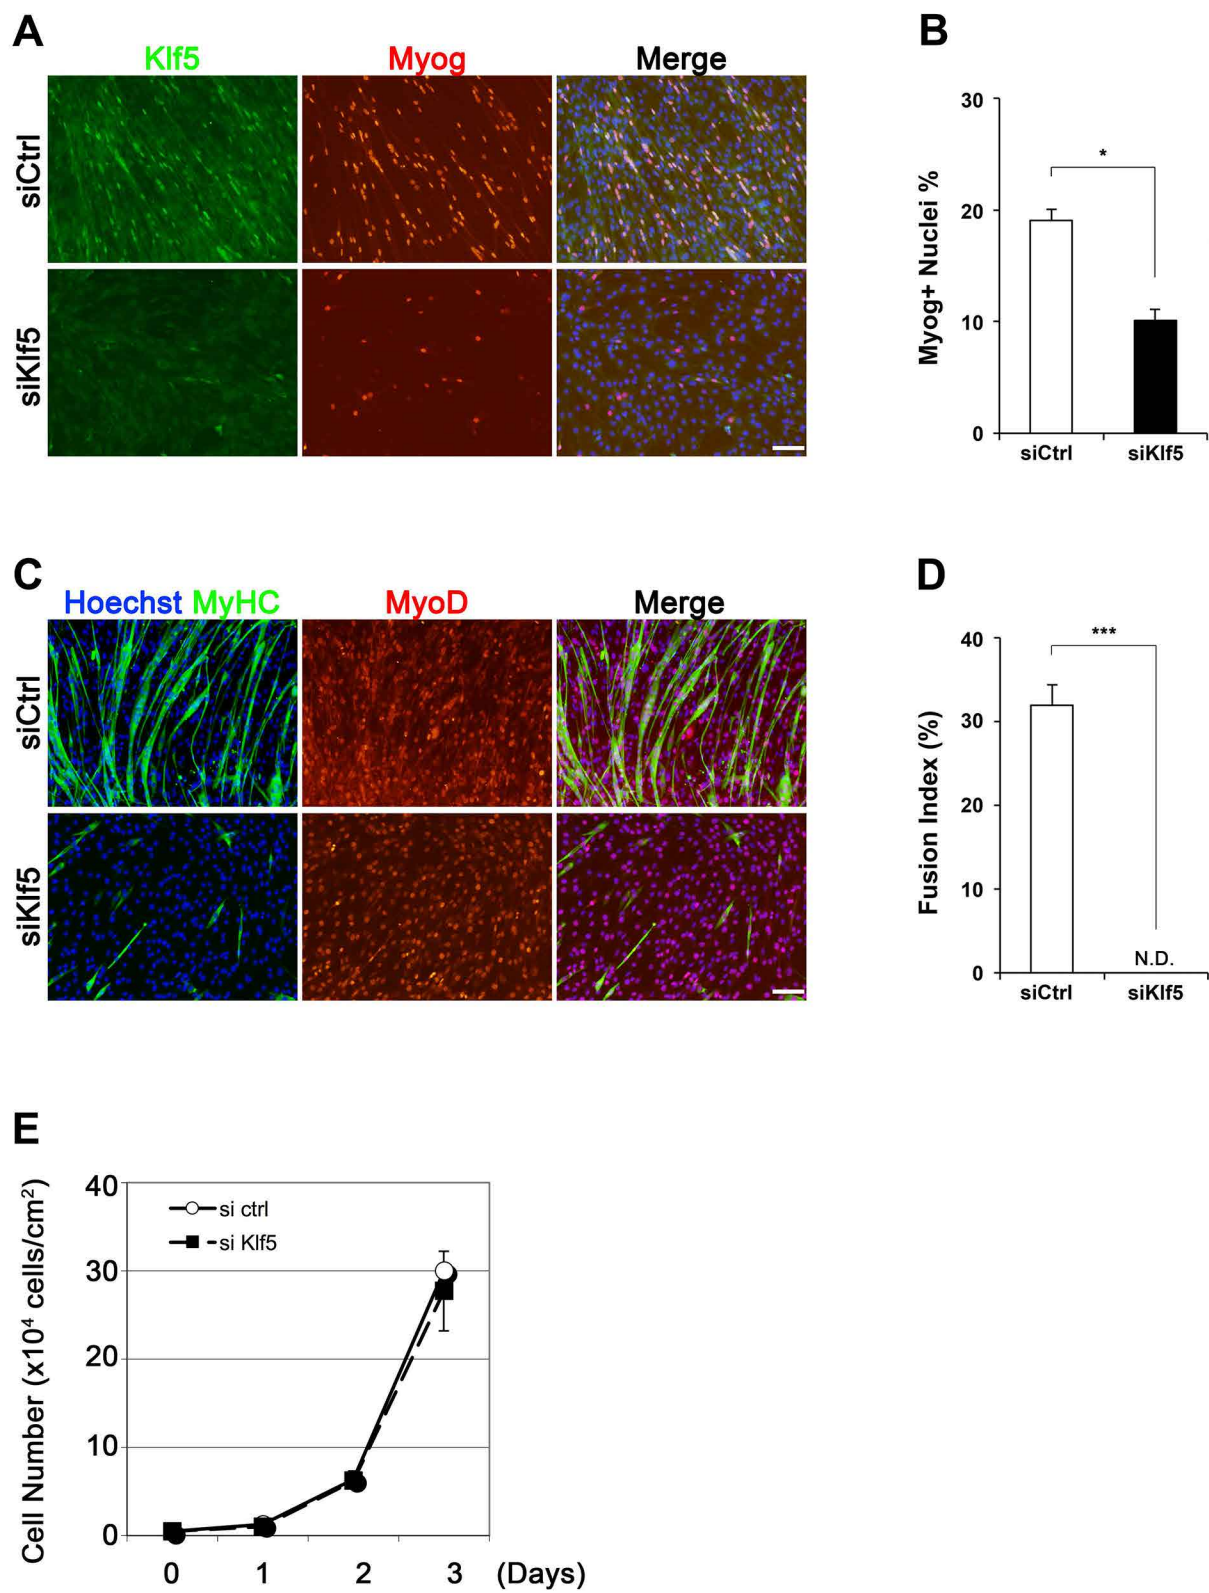

Supplement: supp [file elife-17462-supp-v1.zip]

**A**

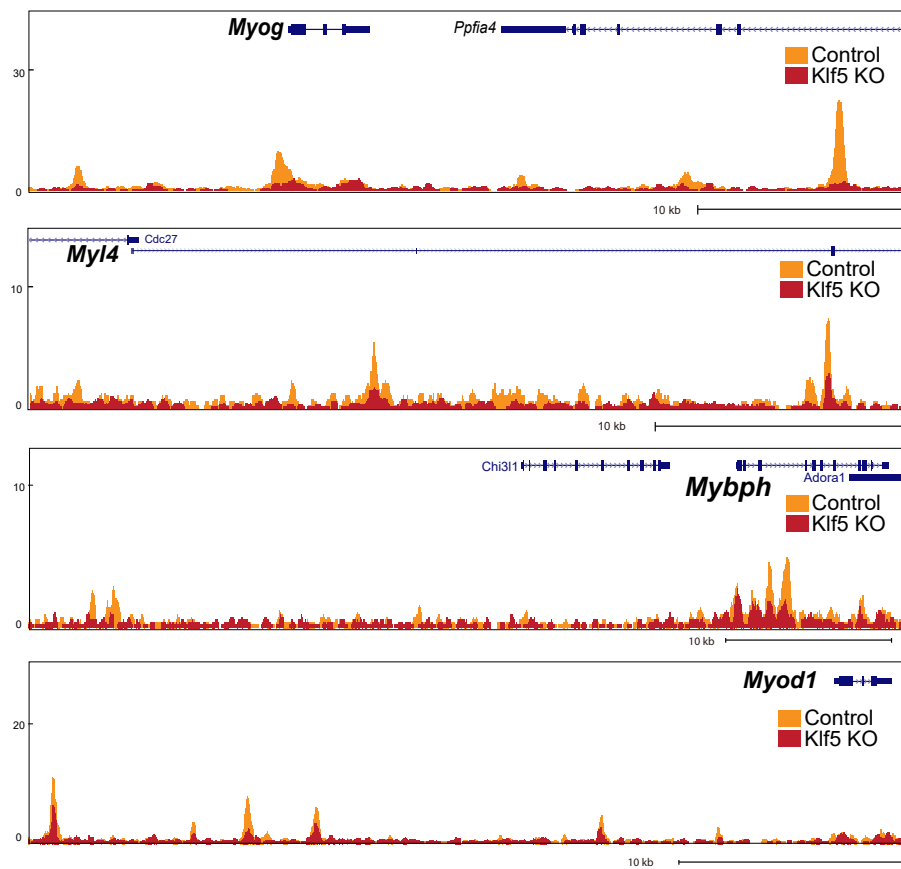

**B**

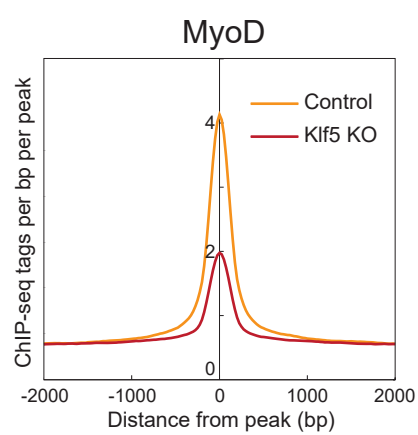

Supplement: supp [file elife-17462-supp-v1.zip]

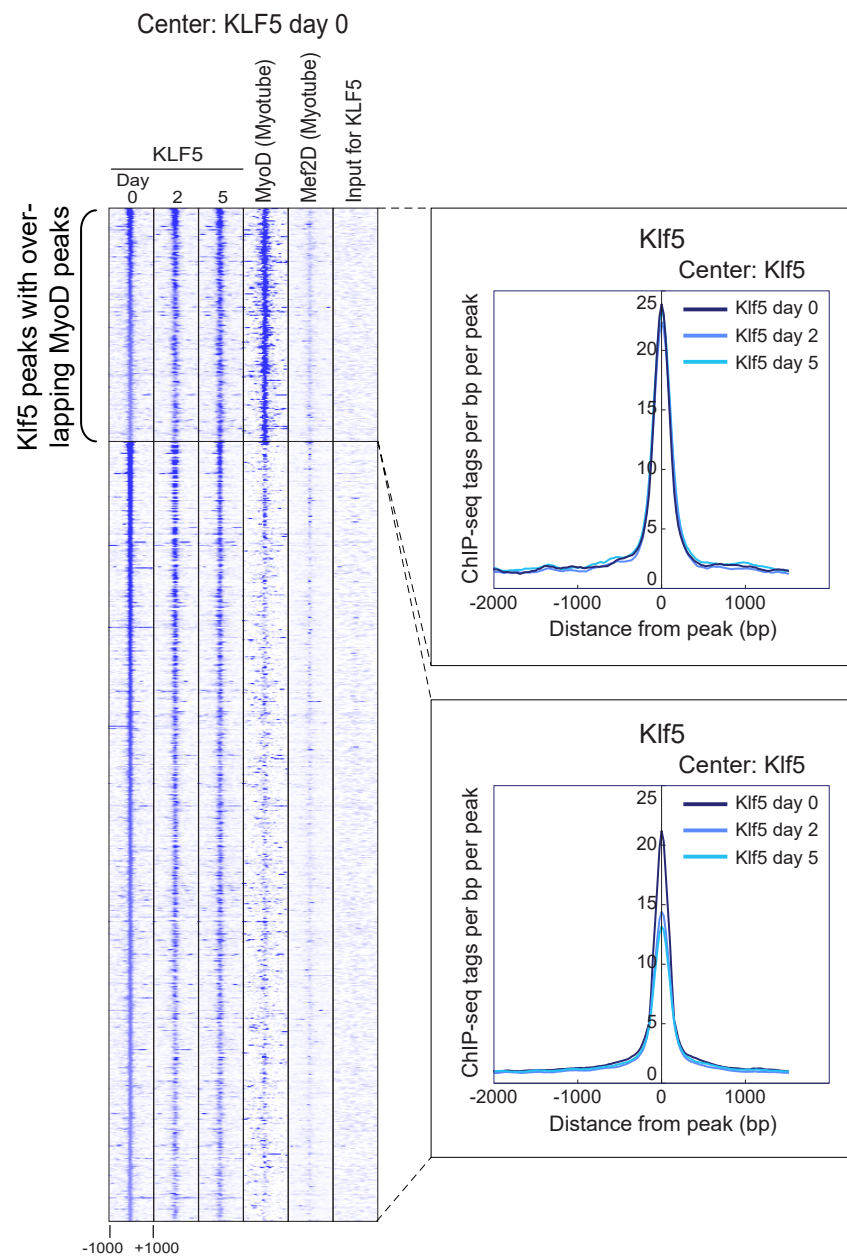

Supplement: supp [file elife-17462-supp-v1.zip › elife_poa_e17462_Figure_5_Figure_Supplement_3.pdf]

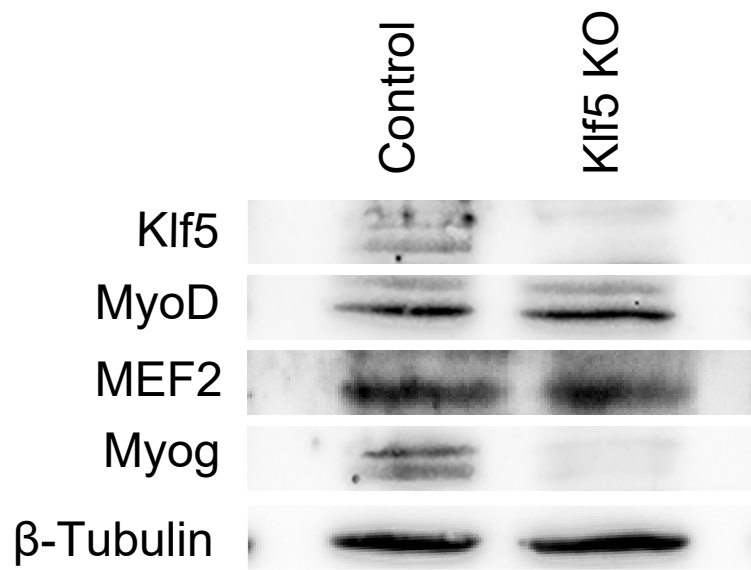

Supplement: supp [file elife-17462-supp-v1.zip › elife_poa_e17462_Figure_6_Figure_Supplement_1.pdf]
